# Supplementary material
Source: ML conference proceedings conference paper supplement (https://proceedings.mlr.press/v119/yu20b.html)
Supplement: Supplementary file [file yu20b-supp.pdf]

## A. Discussion of Assumptions

In this section, we prove that the combinatorial semi-bandit and the cascading bandit satisfy Assumptions 1 and 2 proposed in Section 5.

### A.1. Combinatorial Semi-Bandits

Notice that in a combinatorial semi-bandit, the action  $a = (a_1, \dots, a_K)$ , and

$$r(a, \theta) = \sum_{k=1}^K \theta^{(a_k)} = \sum_{l=1}^L \theta^{(l)} \mathbf{1}(l \in a).$$

Thus, for any  $l$ ,  $r(a, \theta)$  is weakly increasing in  $\theta^{(l)}$ . Hence Assumption 1 is satisfied. On the other hand, we have

$$\begin{aligned} |r(a, \theta_1) - r(a, \theta_2)| &= \left| \sum_{l=1}^L (\theta_1^{(l)} - \theta_2^{(l)}) \mathbf{1}(l \in a) \right| \\ &\leq \sum_{l=1}^L |\theta_1^{(l)} - \theta_2^{(l)}| \mathbf{1}(l \in a) = \sum_{l=1}^L P(E^{(l)} | \theta_2, a) |\theta_1^{(l)} - \theta_2^{(l)}|, \end{aligned} \quad (7)$$

where the last quality follows from the fact that all nodes in a combinatorial semi-bandit is observed, and hence  $P(E^{(l)} | \theta, a) = \mathbf{1}(l \in a)$  for all  $\theta$ . Thus, Assumption 2 is satisfied with  $C = 1$ .

### A.2. Cascading Bandits

For a cascading bandit, the action is  $a = (a_1, \dots, a_K)$ , and

$$r(a, \theta) = 1 - \prod_{k=1}^K (1 - \theta^{(a_k)}) = 1 - \prod_{l \in a} (1 - \theta^{(l)}).$$

Thus, for any  $l$ ,  $r(a, \theta)$  is weakly increasing in  $\theta^{(l)}$ . Hence Assumption 1 is satisfied. On the other hand, from Kveton et al. (2015a), we have

$$\begin{aligned} r(a, \theta_1) - r(a, \theta_2) &= \sum_{k=1}^K \prod_{k_1=1}^{k-1} \left(1 - \theta_2^{(a_{k_1})}\right) \left(\theta_1^{(a_k)} - \theta_2^{(a_k)}\right) \prod_{k_2=k+1}^K \left(1 - \theta_1^{(a_{k_2})}\right) \\ &= \sum_{k=1}^K P(E^{(a_k)} | \theta_2, a) \left(\theta_1^{(a_k)} - \theta_2^{(a_k)}\right) \prod_{k_2=k+1}^K \left(1 - \theta_1^{(a_{k_2})}\right), \end{aligned}$$

where the second equality follows from  $P(E^{(a_k)} | \theta_2, a) = \prod_{k_1=1}^{k-1} \left(1 - \theta_2^{(a_{k_1})}\right)$ . Thus, we have

$$\begin{aligned} |r(a, \theta_1) - r(a, \theta_2)| &= \left| \sum_{k=1}^K P(E^{(a_k)} | \theta_2, a) \left(\theta_1^{(a_k)} - \theta_2^{(a_k)}\right) \prod_{k_2=k+1}^K \left(1 - \theta_1^{(a_{k_2})}\right) \right| \\ &\leq \sum_{k=1}^K P(E^{(a_k)} | \theta_2, a) \left|\theta_1^{(a_k)} - \theta_2^{(a_k)}\right| \prod_{k_2=k+1}^K \left(1 - \theta_1^{(a_{k_2})}\right) \\ &\leq \sum_{k=1}^K P(E^{(a_k)} | \theta_2, a) \left|\theta_1^{(a_k)} - \theta_2^{(a_k)}\right|, \end{aligned}$$

where the last inequality follows from  $\prod_{k_2=k+1}^K \left(1 - \theta_1^{(a_{k_2})}\right) \in [0, 1]$ . Thus, Assumption 2 is satisfied with  $C = 1$ .

## B. Proof for Theorem 1

### Proof:

Recall that the stochastic instantaneous reward is  $r(x, z)$ . Note that  $r(x, z)$  is bounded since its domain is finite. Without loss of generality, we assume that  $r(x, z) \in [0, B]$ . Thus, for any action  $a$  and probability measure  $\theta \in [0, 1]^{d+L}$ , we have  $r(a, \theta) \in [0, B]$ .

Define  $R_t = r(a^*, \theta_*) - r(a_t, \theta_*)$ , then by definition, we have

$$R_B(n) = \sum_{t=1}^n \mathbb{E}[R_t] = \sum_{t=1}^n \mathbb{E}[E[R_t | \mathcal{H}_{t-1}]],$$

where  $\mathcal{H}_{t-1}$  is the ‘‘history’’ by the end of time  $t - 1$ , which includes all the actions and observations by that time<sup>5</sup>. For any parameter index  $i = 1, \dots, d + L$  and any time  $t$ , we define  $N_t^{(i)} = \sum_{\tau=1}^t \mathbf{1}[E_\tau^{(i)}]$  as the number of times that the samples corresponding to parameter  $\theta_*^{(i)}$  have been observed by the end of time  $t$ , and  $\hat{\theta}_t^{(i)}$  as the empirical mean for  $\theta_*^{(i)}$  based on these  $N_t^{(i)}$  observations. Then we define the upper confidence bound (UCB)  $U_t^{(i)}$  and the lower confidence bound (LCB)  $L_t^{(i)}$  as

$$U_t^{(i)} = \begin{cases} \min \left\{ \hat{\theta}_t^{(i)} + c(t, N_t^{(i)}), 1 \right\} & \text{if } N_t^{(i)} > 0 \\ 1 & \text{otherwise} \end{cases}$$

$$L_t^{(i)} = \begin{cases} \max \left\{ \hat{\theta}_t^{(i)} - c(t, N_t^{(i)}), 0 \right\} & \text{if } N_t^{(i)} > 0 \\ 0 & \text{otherwise} \end{cases}$$

where  $c(t, N) = \sqrt{\frac{1.5 \log(t)}{N}}$  for any positive integer  $t$  and  $N$ . Moreover, we define a probability measure  $\tilde{\theta}_t \in [0, 1]^{d+L}$  as

$$\vartheta_t^{(i)} = \begin{cases} U_t^{(i)} & \text{if } i \in \mathcal{I}^+ \\ L_t^{(i)} & \text{if } i \in \mathcal{I}^- \end{cases}$$

Since both  $N_{t-1}^{(i)}$  and  $\hat{\theta}_{t-1}^{(i)}$  are conditionally deterministic given  $\mathcal{H}_{t-1}$ , and  $\mathcal{I}^+$  and  $\mathcal{I}^-$  are deterministic, by the definitions above,  $U_{t-1}$ ,  $L_{t-1}$  and  $\vartheta_{t-1}$  are also conditionally deterministic given  $\mathcal{H}_{t-1}$ . Moreover, as is discussed in [Russo & Van Roy \(2014\)](#), since we apply exact Thompson sampling idTS,  $\theta_*$  and  $\theta_t$  are conditionally i.i.d. given  $\mathcal{H}_{t-1}$ , and  $a^* = \arg \max_a r(a, \theta_*)$  and  $a_t = \arg \max_a r(a, \theta_t)$ . Thus, conditioning on  $\mathcal{H}_{t-1}$ ,  $r(a^*, \vartheta_{t-1})$  and  $r(a_t, \vartheta_{t-1})$  are i.i.d., consequently, we have

$$\begin{aligned} \mathbb{E}[R_t | \mathcal{H}_{t-1}] &= \mathbb{E}[r(a^*, \theta_*) - r(a_t, \theta_*) | \mathcal{H}_{t-1}] \\ &= \mathbb{E}[r(a^*, \theta_*) - r(a^*, \vartheta_{t-1}) | \mathcal{H}_{t-1}] + \mathbb{E}[r(a_t, \vartheta_{t-1}) - r(a_t, \theta_*) | \mathcal{H}_{t-1}]. \end{aligned} \quad (8)$$

To simplify the exposition, for any time  $t$  and  $i = 1, \dots, d + L$ , we define

$$G_t^{(i)} = \left\{ \left| \theta_*^{(i)} - \hat{\theta}_t^{(i)} \right| > c(t, N_t^{(i)}), N_t^{(i)} > 0 \right\} = \left\{ \theta_*^{(i)} > U_t^{(i)} \text{ or } \theta_*^{(i)} < L_t^{(i)} \right\}. \quad (9)$$

Notice that  $\overline{\bigcup_{i=1}^{d+L} G_t^{(i)}} = \overline{\bigcap_{i=1}^{d+L} \overline{G_t^{(i)}}} = \{L_t \leq \theta_* \leq U_t\}$ . Moreover, from Assumption 1, if  $L_t \leq \theta_* \leq U_t$ , based on the definition of  $\vartheta_t$ , we have  $r(a, \theta_*) \leq r(a, \vartheta_t)$  for all action  $a$ . Thus, we have

$$\begin{aligned} r(a^*, \theta_*) - r(a^*, \vartheta_{t-1}) &\stackrel{(a)}{=} [r(a^*, \theta_*) - r(a^*, \vartheta_{t-1})] \mathbf{1}(L_{t-1} \leq \theta_* \leq U_{t-1}) \\ &\quad + [r(a^*, \theta_*) - r(a^*, \vartheta_{t-1})] \mathbf{1} \left( \bigcup_{i=1}^{d+L} G_{t-1}^{(i)} \right) \\ &\stackrel{(b)}{\leq} [r(a^*, \theta_*) - r(a^*, \vartheta_{t-1})] \mathbf{1} \left( \bigcup_{i=1}^{d+L} G_{t-1}^{(i)} \right) \\ &\stackrel{(c)}{\leq} B \mathbf{1} \left( \bigcup_{i=1}^{d+L} G_{t-1}^{(i)} \right) \stackrel{(d)}{\leq} B \sum_{i=1}^{d+L} \mathbf{1}(G_{t-1}^{(i)}), \end{aligned} \quad (10)$$

<sup>5</sup>Rigorously speaking,  $\{\mathcal{H}_t\}_{t=0}^{n-1}$  is a filtration and  $\mathcal{H}_{t-1}$  is a  $\sigma$ -algebra.

where equality (a) is simply a decomposition based on indicators, inequality (b) follows from the fact that  $r(a, \theta_*) \leq r(a, \vartheta_{t-1})$  if  $L_{t-1} \leq \theta_* \leq U_{t-1}$ , inequality (c) follows from the fact that  $r(X, Z) \in [0, B]$  for all  $(X, Z)$  and hence  $r(a, \theta) \in [0, B]$  for all  $a$  and  $\theta$ , and inequality (d) trivially follows from the union bound of the indicators.

On the other hand, we have

$$\begin{aligned} r(a_t, \vartheta_{t-1}) - r(a_t, \theta_*) &= [r(a_t, \vartheta_{t-1}) - r(a_t, \theta_*)] \mathbf{1}(L_{t-1} \leq \theta_* \leq U_{t-1}) \\ &\quad + [r(a_t, \vartheta_{t-1}) - r(a_t, \theta_*)] \mathbf{1}\left(\bigcup_{i=1}^{d+L} G_{t-1}^{(i)}\right). \end{aligned}$$

Similarly as the above analysis, we have

$$[r(a_t, \vartheta_{t-1}) - r(a_t, \theta_*)] \mathbf{1}\left(\bigcup_{i=1}^{d+L} G_{t-1}^{(i)}\right) \leq B \sum_{i=1}^{d+L} \mathbf{1}(G_{t-1}^{(i)}). \quad (11)$$

On the other hand, we have

$$\begin{aligned} [r(a_t, \vartheta_{t-1}) - r(a_t, \theta_*)] \mathbf{1}(L_{t-1} \leq \theta_* \leq U_{t-1}) &\stackrel{(a)}{\leq} C \sum_{i=1}^{d+L} P\left(E_t^{(i)} \mid \theta_*, a_t\right) \left| \vartheta_{t-1}^{(i)} - \theta_*^{(i)} \right| \mathbf{1}(L_{t-1} \leq \theta_* \leq U_{t-1}) \\ &\stackrel{(b)}{\leq} C \sum_{i=1}^{d+L} P\left(E_t^{(i)} \mid \theta_*, a_t\right) \left[ U_{t-1}^{(i)} - L_{t-1}^{(i)} \right] \mathbf{1}(L_{t-1} \leq \theta_* \leq U_{t-1}) \\ &\stackrel{(c)}{\leq} C \sum_{i=1}^{d+L} P\left(E_t^{(i)} \mid \theta_*, a_t\right) \left[ U_{t-1}^{(i)} - L_{t-1}^{(i)} \right], \end{aligned}$$

where inequality (a) follows from Assumption 2, inequality (b) follows trivially from  $L_{t-1} \leq \theta_* \leq U_{t-1}$  and the definition of  $\vartheta_{t-1}$ , and inequality (c) follows from the fact that  $U_{t-1}^{(i)} > L_{t-1}^{(i)}$  always holds, no matter what  $\theta_*$  is. Combining the above results, we have

$$\begin{aligned} \mathbb{E}[R_t \mid \mathcal{H}_{t-1}] &\leq C \sum_{i=1}^{d+L} \mathbb{E}\left[ P\left(E_t^{(i)} \mid \theta_*, a_t\right) \left[ U_{t-1}^{(i)} - L_{t-1}^{(i)} \right] \mid \mathcal{H}_{t-1} \right] + 2B \sum_{i=1}^{d+L} \mathbb{E}\left[ \mathbf{1}(G_{t-1}^{(i)}) \mid \mathcal{H}_{t-1} \right] \\ &\stackrel{(a)}{=} C \sum_{i=1}^{d+L} \mathbb{E}\left[ P\left(E_t^{(i)} \mid \theta_*, a_t\right) \mid \mathcal{H}_{t-1} \right] \left[ U_{t-1}^{(i)} - L_{t-1}^{(i)} \right] + 2B \sum_{i=1}^{d+L} \mathbb{E}\left[ \mathbf{1}(G_{t-1}^{(i)}) \mid \mathcal{H}_{t-1} \right] \\ &\stackrel{(b)}{=} C \sum_{i=1}^{d+L} \mathbb{E}\left[ \mathbb{E}\left[ \mathbf{1}(E_t^{(i)}) \mid \theta_*, a_t \right] \mid \mathcal{H}_{t-1} \right] \left[ U_{t-1}^{(i)} - L_{t-1}^{(i)} \right] + 2B \sum_{i=1}^{d+L} \mathbb{E}\left[ \mathbf{1}(G_{t-1}^{(i)}) \mid \mathcal{H}_{t-1} \right] \\ &\stackrel{(c)}{=} C \sum_{i=1}^{d+L} \mathbb{E}\left[ \mathbb{E}\left[ \mathbf{1}(E_t^{(i)}) \mid \theta_*, a_t, \mathcal{H}_{t-1} \right] \mid \mathcal{H}_{t-1} \right] \left[ U_{t-1}^{(i)} - L_{t-1}^{(i)} \right] + 2B \sum_{i=1}^{d+L} \mathbb{E}\left[ \mathbf{1}(G_{t-1}^{(i)}) \mid \mathcal{H}_{t-1} \right] \\ &\stackrel{(d)}{=} C \sum_{i=1}^{d+L} \mathbb{E}\left[ \mathbf{1}(E_t^{(i)}) \left[ U_{t-1}^{(i)} - L_{t-1}^{(i)} \right] \mid \mathcal{H}_{t-1} \right] + 2B \sum_{i=1}^{d+L} \mathbb{E}\left[ \mathbf{1}(G_{t-1}^{(i)}) \mid \mathcal{H}_{t-1} \right], \end{aligned}$$

where (a) follows from the fact that  $U_{t-1}$  and  $L_{t-1}$  are deterministic conditioning on  $\mathcal{H}_{t-1}$ , (b) follows from the definition of  $P\left(E_t^{(i)} \mid \theta_*, a_t\right)$ , (c) follows from that fact that conditioning on  $\theta_*$  and  $a_t$ ,  $E_t^{(i)}$  is independent of  $\mathcal{H}_{t-1}$ , and (d) follows from the tower property. Thus we have

$$R_B(n) \leq C \mathbb{E}\left[ \sum_{i=1}^{d+L} \sum_{t=1}^n \mathbf{1}(E_t^{(i)}) \left[ U_{t-1}^{(i)} - L_{t-1}^{(i)} \right] \right] + 2B \sum_{i=1}^{d+L} \sum_{t=1}^n P\left(G_{t-1}^{(i)}\right). \quad (12)$$

We first bound the second term. Notice that we have  $P\left(G_{t-1}^{(i)}\right) = \mathbb{E}\left[ P\left(G_{t-1}^{(i)} \mid \theta_*\right) \right]$ . For any  $\theta_*$ , we have

$$P\left(G_{t-1}^{(i)} \mid \theta_*\right) = P\left(\left| \theta_*^{(i)} - \hat{\theta}_{N_{t-1}^{(i)}}^{(i)} \right| > c\left(t, N_{t-1}^{(i)}\right), N_{t-1}^{(i)} > 0 \mid \theta_*\right),$$

where we use subscript  $N_{t-1}^{(i)}$  for  $\hat{\theta}$  to emphasize it is an empirical mean over  $N_{t-1}^{(i)}$  samples. Following the union bound developed in Auer et al. (2002), we have

$$\begin{aligned} P\left(G_{t-1}^{(i)} \mid \theta_*\right) &= P\left(\left|\theta_*^{(i)} - \hat{\theta}_{N_{t-1}^{(i)}}^{(i)}\right| > c\left(t, N_{t-1}^{(i)}\right), N_{t-1}^{(i)} > 0 \mid \theta_*\right) \\ &\stackrel{(a)}{\leq} \sum_{N=1}^{t-1} P\left(\left|\theta_*^{(i)} - \hat{\theta}_N^{(i)}\right| > c(t, N) \mid \theta_*\right) \stackrel{(b)}{\leq} \sum_{t=1}^{N-1} \frac{2}{t^3} < \frac{2}{t^2}, \end{aligned}$$

where inequality (a) follows from the union bound over the realization of  $N_{t-1}^{(i)}$ , and inequality (b) follows from the Hoeffding's inequality. Since the above inequality holds for any  $\theta_*$ , we have  $P\left(G_{t-1}^{(i)}\right) < \frac{2}{t^2}$ . Thus,

$$\sum_{i=1}^{d+L} \sum_{t=1}^n P\left(G_{t-1}^{(i)}\right) < \sum_{i=1}^{d+L} \sum_{t=1}^n \frac{2}{t^2} < (d+L) \sum_{t=1}^{\infty} \frac{2}{t^2} = \frac{(d+L)\pi^2}{3}.$$

We now try to bound the first term of equation 12. Notice that trivially, we have

$$\begin{aligned} U_{t-1}^{(i)} - L_{t-1}^{(i)} &\leq 2c\left(t, N_{t-1}^{(i)}\right) \mathbf{1}\left(N_{t-1}^{(i)} > 0\right) + \mathbf{1}\left(N_{t-1}^{(i)} = 0\right) \\ &= 2\sqrt{\frac{1.5 \log(t)}{N_{t-1}^{(i)}}} \mathbf{1}\left(N_{t-1}^{(i)} > 0\right) + \mathbf{1}\left(N_{t-1}^{(i)} = 0\right) \\ &\leq \sqrt{6 \log(n)} \frac{1}{\sqrt{N_{t-1}^{(i)}}} \mathbf{1}\left(N_{t-1}^{(i)} > 0\right) + \mathbf{1}\left(N_{t-1}^{(i)} = 0\right). \end{aligned}$$

Thus, we have

$$\sum_{i=1}^{d+L} \sum_{t=1}^n \mathbf{1}\left(E_t^{(i)}\right) \left[U_{t-1}^{(i)} - L_{t-1}^{(i)}\right] \leq \sqrt{6 \log(n)} \sum_{i=1}^{d+L} \sum_{t=1}^n \frac{1}{\sqrt{N_{t-1}^{(i)}}} \mathbf{1}\left(E_t^{(i)}, N_{t-1}^{(i)} > 0\right) + (d+L).$$

Notice that from the Cauchy–Schwarz inequality, we have

$$\sum_{i=1}^{d+L} \sum_{t=1}^n \frac{1}{\sqrt{N_{t-1}^{(i)}}} \mathbf{1}\left(E_t^{(i)}, N_{t-1}^{(i)} > 0\right) \leq \sqrt{\sum_{t=1}^n \sum_{i=1}^{d+L} \mathbf{1}\left(E_t^{(i)}\right)} \sqrt{\sum_{i=1}^{d+L} \sum_{t=1}^n \frac{1}{N_{t-1}^{(i)}} \mathbf{1}\left(N_{t-1}^{(i)} > 0\right)}. \quad (13)$$

Moreover, we have

$$\sum_{i=1}^{d+L} \sum_{t=1}^n \frac{1}{N_{t-1}^{(i)}} \mathbf{1}\left(N_{t-1}^{(i)} > 0\right) < (d+L) \sum_{N=1}^n \frac{1}{N} < (d+L) \left(1 + \int_{z=1}^n \frac{1}{z} dz\right) = (d+L)(1 + \log(n)).$$

Consequently, we have

$$\mathbb{E} \left[ \sum_{i=1}^{d+L} \sum_{t=1}^n \mathbf{1}\left(E_t^{(i)}\right) \left[U_{t-1}^{(i)} - L_{t-1}^{(i)}\right] \right] \leq \sqrt{6(d+L) \log(n) (1 + \log(n))} \mathbb{E} \left[ \sqrt{\sum_{t=1}^n \sum_{i=1}^{d+L} \mathbf{1}\left(E_t^{(i)}\right)} \right] + (d+L).$$

Moreover, we have

$$\begin{aligned} \mathbb{E} \left[ \sqrt{\sum_{t=1}^n \sum_{i=1}^{d+L} \mathbf{1}\left(E_t^{(i)}\right)} \right] &\leq \sqrt{\sum_{t=1}^n \mathbb{E} \left[ \sum_{i=1}^{d+L} \mathbf{1}\left(E_t^{(i)}\right) \right]} \stackrel{(a)}{=} \sqrt{\sum_{t=1}^n \mathbb{E} \left[ \mathbb{E} \left[ \sum_{i=1}^{d+L} \mathbf{1}\left(E_t^{(i)}\right) \mid a_t \right] \right]} \\ &\leq \sqrt{\sum_{t=1}^n \mathbb{E} \left[ \max_a \mathbb{E} \left[ \sum_{i=1}^{d+L} \mathbf{1}\left(E_t^{(i)}\right) \mid a \right] \right]} \stackrel{(b)}{=} \sqrt{\sum_{t=1}^n \mathbb{E} [O_{\max}]} = \sqrt{n O_{\max}}, \end{aligned} \quad (14)$$

where equality (a) follows from the tower property, and equality (b) follows from the definition of  $O_{\max}$ . Thus, we have

$$\sum_{i=1}^{d+L} \sum_{t=1}^n \mathbf{1} \left( E_t^{(i)} \right) \left[ U_{t-1}^{(i)} - L_{t-1}^{(i)} \right] \leq \sqrt{6(d+L)O_{\max}n \log(n) (1 + \log(n))} + (d+L)$$

Putting everything together, we have

$$\begin{aligned} R_B(n) &\leq C \sqrt{6(d+L)O_{\max}n \log(n) (1 + \log(n))} + \left( C + \frac{2\pi^2}{3} B \right) (d+L) \\ &= \mathcal{O} \left( C \sqrt{(d+L)O_{\max}n \log(n)} \right). \end{aligned} \tag{15}$$

**q.e.d.**

### C. Pseudocode of idTSinc

The pseudocode of idTSinc is summarized in Algorithm 2.

---

**Algorithm 2** idTSinc: A computationally efficient variant of idTSvi.

---

- 1: **Input:**  $\epsilon > 0$
  - 2: Randomly initialize  $q$
  - 3: **for**  $t = 1, \dots, n$  **do**
  - 4: Sample  $\theta_t$  proportionally to  $q(\theta_t)$
  - 5: Take action  $a_t = \arg \max_{a \in \mathcal{A}^\kappa} r(a, \theta_t)$
  - 6: Observes  $x_t$  and receive reward  $r(x_t, z_t)$
  - 7: Randomly initialize  $q$
  - 8: Calculate  $\mathcal{L}(q)$  using (3) and set  $\mathcal{L}'(q) = -\infty$
  - 9: **while**  $\mathcal{L}(q) - \mathcal{L}'(q) \geq \epsilon$  **do**
  - 10: Set  $\mathcal{L}'(q) = \mathcal{L}(q)$
  - 11: Update  $q_t(z_t)$  using (4), for all  $z_t$
  - 12: Update  $q(\theta)$  using (5)
  - 13: Update  $\mathcal{L}(q)$  using (3)
  - 14: **end while**
  - 15: **end for**
-
